# Supplementary material
Source: PubMed Central journal article supplement (PMC9434103)
Supplement: EMBJ-41-e109205-s001.pdf [file EMBJ-41-e109205-s001.pdf]

# **ECM dimensionality tunes actin tension to modulate endoplasmic reticulum function and spheroid phenotypes of mammary epithelial cells**

FuiBoon Kai<sup>1</sup>, Guanqing Ou<sup>1</sup>, Richard W. Tourdot<sup>2</sup>, Connor Stashko<sup>1</sup>, Guido Gaietta<sup>3</sup>, Mark F. Swift<sup>3</sup>, Niels Volkmann<sup>3,4</sup>, Alexandra F. Long<sup>5,6</sup>, Yulong Han<sup>7</sup>, Hector H. Huang<sup>8</sup>, Jason J. Northey<sup>1</sup>, Andrew M. Leidal<sup>9</sup>, Virgile Viasnoff<sup>10</sup>, David M. Bryant<sup>11</sup>, Wei Guo<sup>12</sup>, Arun P. Wiita<sup>8</sup>, Ming Guo<sup>7</sup>, Sophie Dumont<sup>6,13</sup>, Dorit Hanein<sup>3,14</sup>, Ravi Radhakrishnan<sup>2</sup>, Valerie M. Weaver<sup>\*1,15</sup>.

<sup>1</sup>Center for Bioengineering and Tissue Regeneration, Department of Surgery, University of California San Francisco, San Francisco, CA, USA

<sup>2</sup>Department of Bioengineering, Department of Chemical and Biomolecular Engineering, University of Pennsylvania, Philadelphia, PA, USA

<sup>3</sup>Scintillon Institute, San Diego, CA, USA

<sup>4</sup>Structural Image Analysis Unit, Department of Structural Biology and Chemistry, Institut Pasteur, Université Paris Cité, CNRS UMR3528, Paris, France.

<sup>5</sup>Tetrad Graduate Program, University of California San Francisco, San Francisco, CA, USA

<sup>6</sup>Department of Bioengineering and Therapeutic Sciences, Department of Cell & Tissue Biology, University of California San Francisco, San Francisco, CA, USA

<sup>7</sup>Department of Mechanical Engineering, Massachusetts Institute of Technology, Cambridge, MA, USA

<sup>8</sup>Department of Laboratory Medicine, University of California San Francisco, San Francisco, CA, USA

<sup>9</sup>Department of Pathology, University of California San Francisco, San Francisco, CA, USA

<sup>10</sup>Mechanobiology Institute, National University of Singapore, Singapore, Singapore

<sup>11</sup>Cancer Research UK Beatson Institute, Glasgow, UK

<sup>12</sup>Department of Biology, University of Pennsylvania, Philadelphia, PA, USA

<sup>13</sup>Chan Zuckerberg Biohub, San Francisco, CA 94158

<sup>14</sup>Structural Studies of Macromolecular Machines in Cellulo Unit, Department of Structural Biology and Chemistry, Institut Pasteur, Université Paris Cité, CNRS UMR3528, Paris, France.

<sup>15</sup>Departments of Radiation Oncology and Bioengineering and Therapeutic Sciences, Eli and Edythe Broad Center of Regeneration Medicine and Stem Cell Research, and UCSF Helen Diller Comprehensive Cancer Center, University of California San Francisco, San Francisco, CA, USA

## Table of Contents

|                                                                                               |          |
|-----------------------------------------------------------------------------------------------|----------|
| <b>APPENDIX FIGURE S1. RBM LIGATION IN 3D DOES NOT DECREASE ACTININ EXPRESSION LEVEL.....</b> | <b>4</b> |
| <b>APPENDIX FIGURE S2. SNAPSHOT OF MEMBRANE SIMULATION.....</b>                               | <b>6</b> |
| <b>APPENDIX TABLE S1. MEMBRANE EXCESS AREA AND RENORMALIZED SURFACE TENSION. ....</b>         | <b>8</b> |

**Appendix Figure S1**

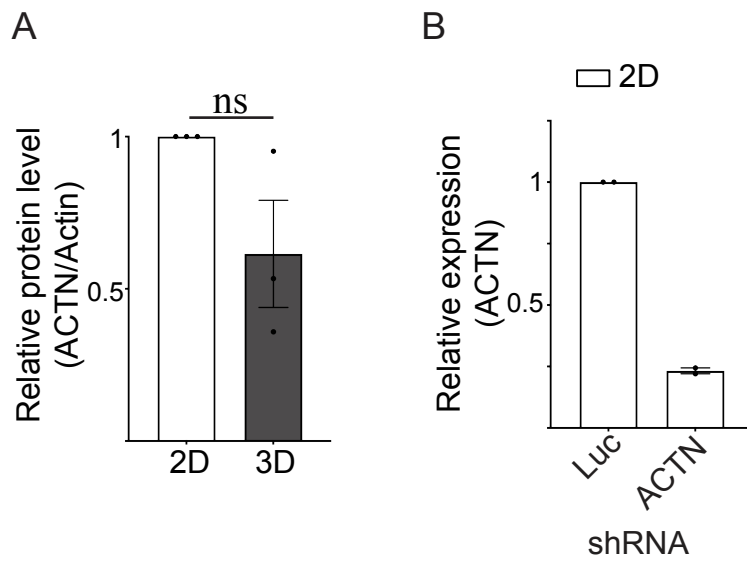

**Appendix Figure S1. rBM ligation in 3D does not decrease actinin expression level. (A)** The expression level of actinin in MCF10A MECs ligated to rBM in 2D and 3D for 18h was assessed via immunoblot and quantified relative to loading control actin (mean  $\pm$  SEM; n=3 independent biological replicates). ns, not significant (Student's t test). **(B)** Bar graph of the levels of endogenous actinin (ACTN) in MECs stably expressing shRNA against ACTN or luciferase (Luc) (mean  $\pm$  SEM; n =2 independent biological replicates).

Appendix Figure S2

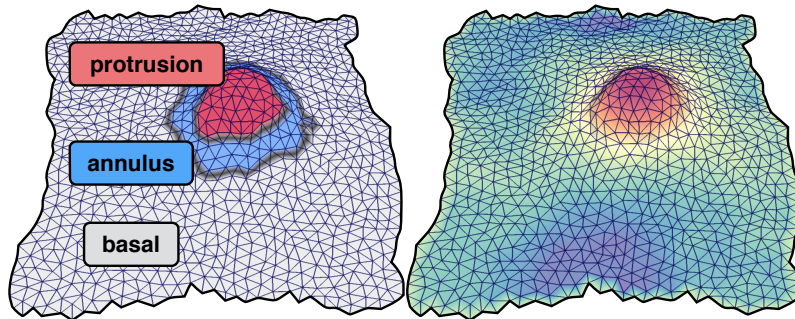

**Appendix Figure S2. Snapshot of membrane simulation.** (Left) Three inhomogeneous Widom regions (protrusions, annulus, and basal regions) and (right) a heightmap of the z-axis of a membrane protrusion are shown.

**Appendix Table S1**

| Initial link length | $A/A_p$ | Renormalized $\sigma$<br>( $k_B T / a_0^2$ ) | Renormalized $\sigma$<br>( $\mu\text{N/m}$ ) $a_0 = 10 \text{ nm}$ |
|---------------------|---------|----------------------------------------------|--------------------------------------------------------------------|
| 1.27                | 1.0754  | 0.165312855                                  | 6.794358356                                                        |
| 1.3                 | 1.0295  | 0.51881372                                   | 21.32324391                                                        |
| 1.33                | 1.0156  | 0.85017139                                   | 34.94204415                                                        |
| 1.35                | 1.0132  | 1.066002153                                  | 43.81268848                                                        |
| 1.38                | 1.0117  | 1.390551811                                  | 57.15167943                                                        |
| 1.4                 | 1.0112  | 1.619003582                                  | 66.54104724                                                        |

**Appendix Table S1. Membrane excess area and renormalized surface tension.**
